# Supplementary material
Source: PubMed Central journal article supplement (PMC2583164)
Supplement: NIHMS69164-supplement-2.pdf [file NIHMS69164-supplement-2.pdf]

## Supplemental Supporting Information

### Supporting Materials and Methods

Immunofluorescence (IF) was performed using standard procedures (1). Specifically, yeast cells were fixed with 4% (w/v) formaldehyde and were digested with Zymolyase 100T (MP Biomedicals, Solon, OH). After digestion, the cells were placed on polylysine-treated cover slips and were exposed to an anti-hemagglutinin (HA) monoclonal antibody (Covance, Berkeley, CA) for 30 min, followed by incubation for 30 min with an anti-mouse antibody-fluorescein isothiocyanate (FITC) conjugate (Invitrogen, Carlsbad, CA). Cells were visualized using a Nikon Eclipse 80i microscope with a 60X oil immersion objectives. Fluorescent images were acquired using a digital camera and SPOT software (Diagnostics Instruments, Inc., Sterling Heights, MI).

1. Pringle, J. R., Adams, A. E. M., Drubin, D. G. & Haarer, B. K. (1991) *Methods Enzymol* **194**, 565-602.

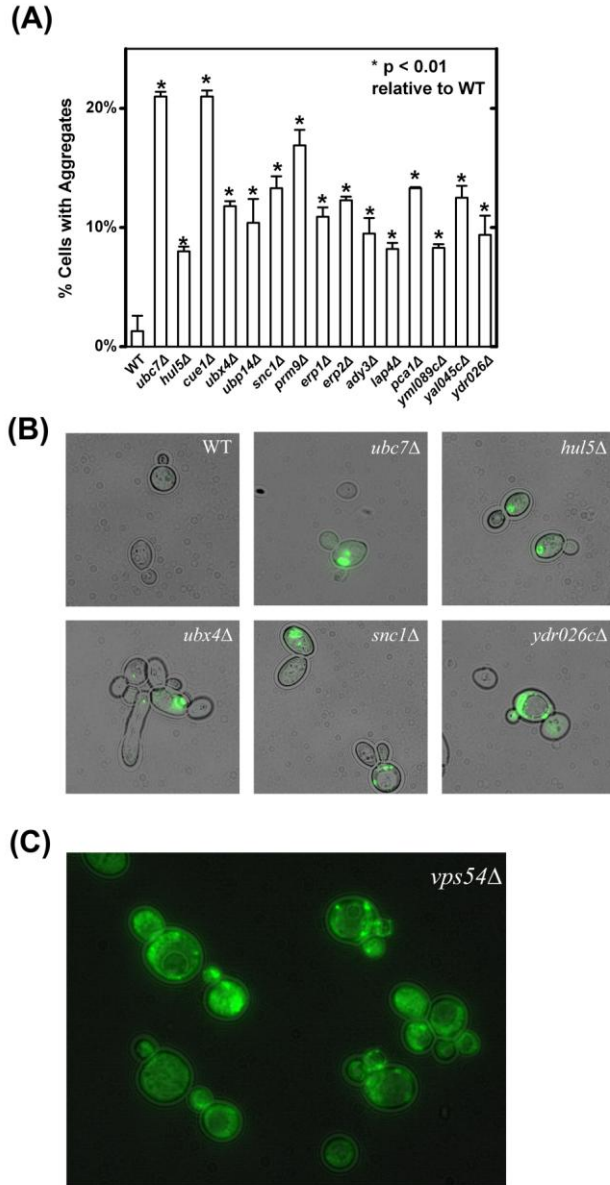

**Figure S1.** The effect of gene deletions on TPMT\*3A-GFP degradation and aggregation in isolated yeast mutants that displayed enhanced fluorescence intensity is shown. (A) Increased frequency of TPMT\*3A-GFP aggregate formation in *ubc7Δ*, *hul5Δ*, *cue1Δ*, *ubx4Δ*, *ubp14Δ*, *snc1Δ*, *prm9Δ*, *erp1Δ*, *erp2Δ*, *ady3Δ*, *lap4Δ*, *pca1Δ*, *yml089cΔ*, *yal045cΔ* and *ydr026cΔ* strains. A total of 200 cells were counted in each experiment. (B) TPMT\*3A-GFP was expressed in the parental yeast strain BY4743 (WT) and five gene deletion strains (*ubc7Δ*, *hul5Δ*, *ubx4Δ*, *snc1Δ* and *ydr026cΔ*) that exhibited enhanced TPMT\*3A-GFP aggregation on the basis of flow cytometry studies. (C) TPMT\*3A-GFP formed micro-aggregates in *rpn10Δ*, *syn8Δ*, *erv46Δ*, *pex22Δ*, *vps54Δ*, *snx4Δ*, *cne1Δ* and *bud14Δ* gene deletion strains. TPMT\*3A-GFP aggregates were visualized with epifluorescence microscopy.

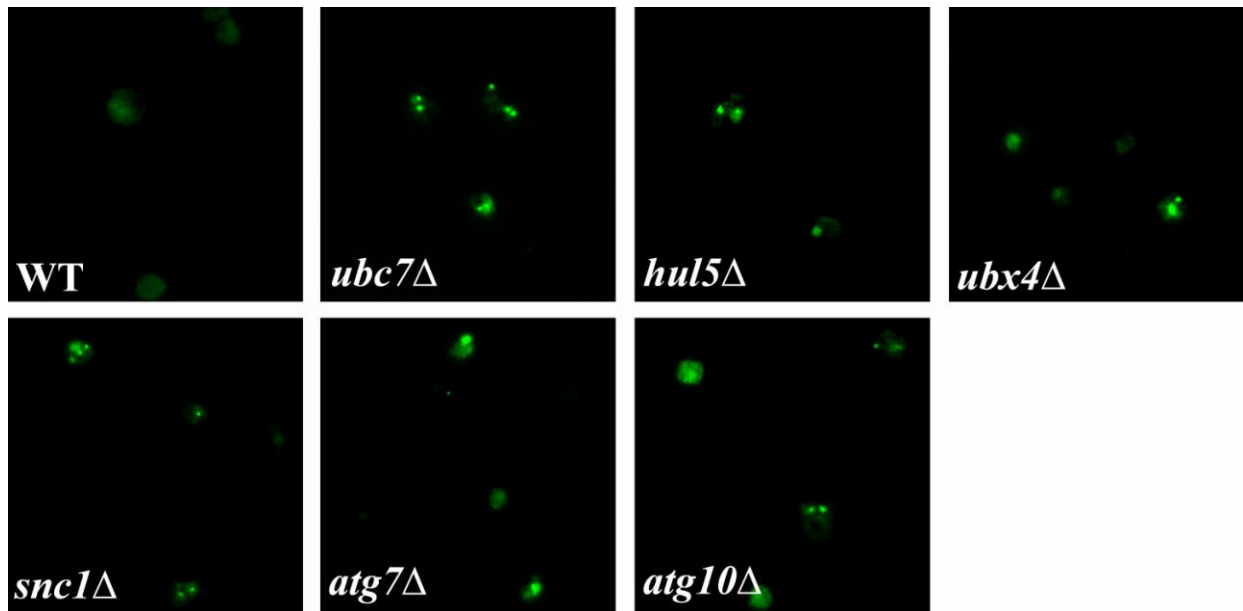

Figure S2. TPMT\*3A aggregation in yeast mutants selected for study was not an artifact related to GFP fusion. Immunofluorescence of yeast WT and mutant cells expressing hemagglutinin (HA)-tagged TPMT\*3A was performed with anti-HA antibody, followed by an FITC-conjugated anti-mouse secondary antibody. Inclusions were similar in number, size and distributions to those observed with the TPMT\*3A-GFP fusion construct.
